# Supplementary material for: Postischemic Infusion of Apigenin Reduces Seizure Burden in Preterm Fetal Sheep
Source: MDPI journal article supplement (doi:10.3390/ijms242316926), 2023-11-29
Supplement: s1 [file s1]

## Supplementary Materials

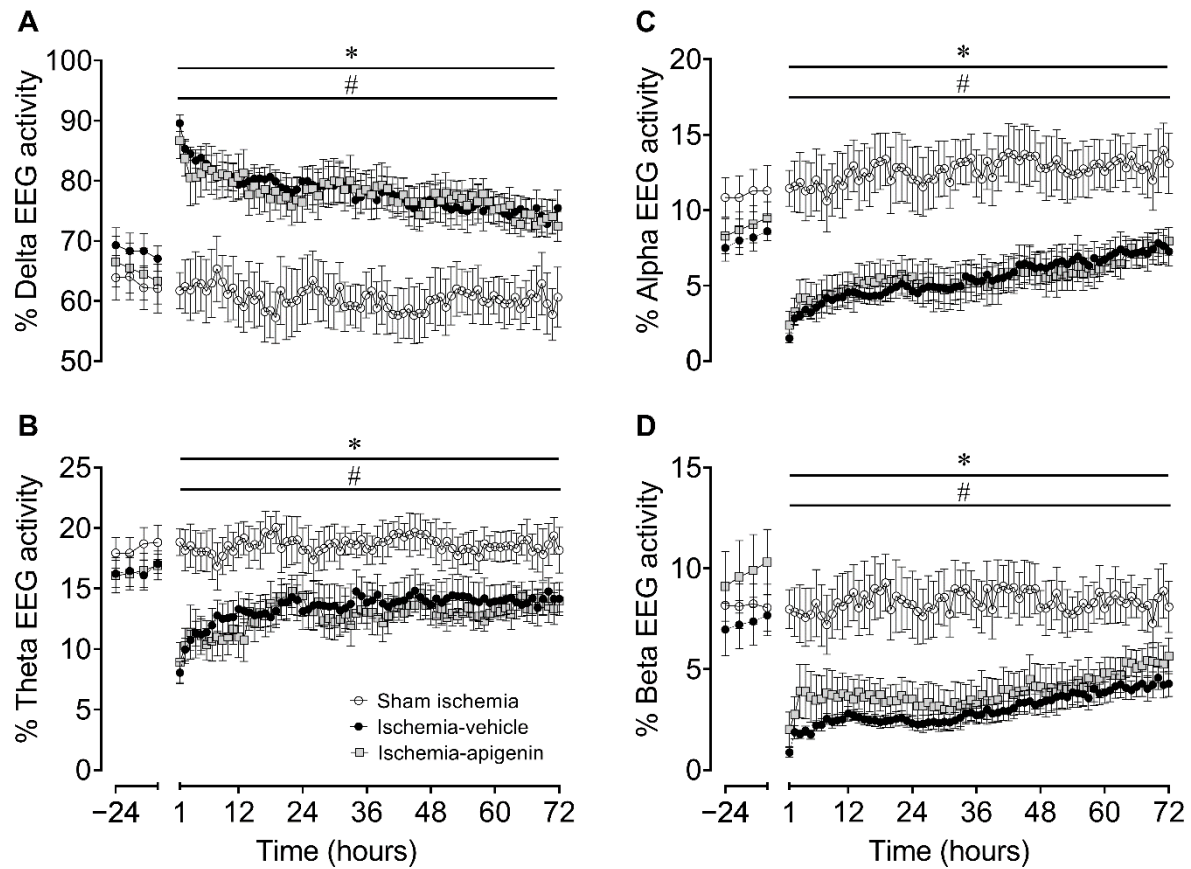

**Figure S1.** Time sequence of changes in the percentage of fetal electroencephalographic (EEG) power in the delta- (A), theta- (B), alpha- (C), and beta- (D) frequency bands from 24 h before until 72 h after carotid occlusion in the sham ischemia (open circles;  $n = 9$ , 4 females, 5 males), ischemia-vehicle (closed circles;  $n = 8$ , 3 females, 5 males), and ischemia-apigenin (grey squares;  $n = 6$ , 4 females, 2 males) groups. Time zero denotes the end of the period of 25 min of cerebral ischemia (not shown). Note that for presentation purposes, EEG datasets for ischemia-apigenin and ischemia-S3 (see Fig. S2) are plotted as separate graphs, but contain the same sham ischemia and ischemia-vehicle datasets. Data are mean  $\pm$  standard error of the mean (SEM) (of 6-h averages for baseline period, and 1-h averages post-occlusion). Statistical significance was determined by repeated-measures analysis of variance (ANOVA), followed by Fisher's least significant difference (LSD) post hoc analysis. \* $P < 0.05$ , sham ischemia vs. ischemia-vehicle; # $P < 0.05$ , sham ischemia vs. ischemia-apigenin.

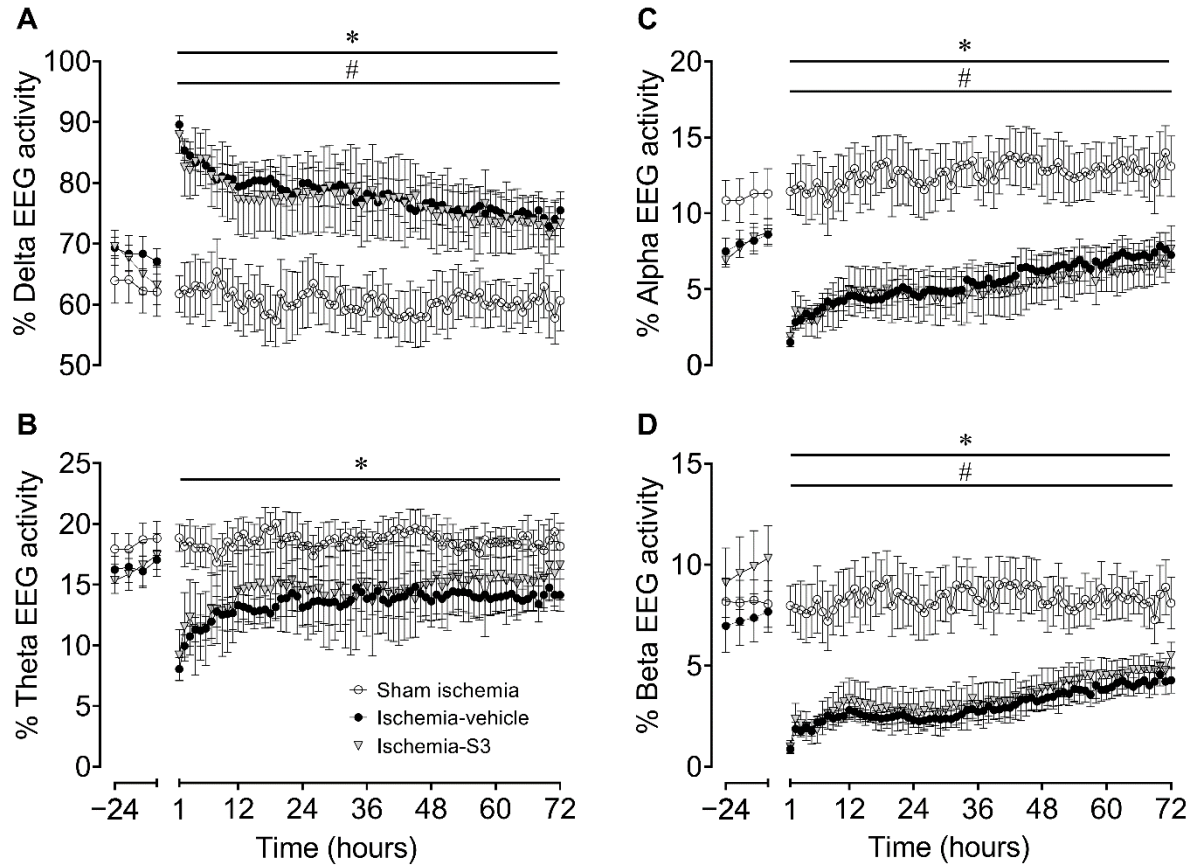

**Figure S2.** Time sequence of changes in the percentage of EEG power in the delta- (A), theta- (B), alpha- (C), and beta- (D) frequency bands from 24 h before until 72 h after carotid occlusion in the sham ischemia (open circles;  $n = 9$ , 4 females, 5 males), ischemia-vehicle (closed circles;  $n = 8$ , 3 females, 5 males), and ischemia-S3 (C, grey triangles;  $n = 3$ , 2 females, 1 male) groups. Time zero denotes the end of the period of 25 min of cerebral ischemia (not shown). Note that for presentation purposes, EEG datasets for ischemia-apigenin (see Supplementary Fig. 1) and ischemia-S3 are plotted as separate graphs, but contain the same sham ischemia and ischemia-vehicle datasets. Data are mean  $\pm$  SEM (of 6-h averages for baseline period, and 1-h averages post-occlusion). Statistical significance was determined by repeated-measures ANOVA, followed by Fisher's LSD post hoc analysis. \* $P < 0.05$ , sham ischemia vs. ischemia-vehicle; # $P < 0.05$ , sham ischemia vs. ischemia-S3.
